# Supplementary material for: Pandemic Avian Influenza and Intra/Interhaemagglutinin Subtype Electrostatic Variation among Viruses Isolated from Avian, Mammalian, and Human Hosts
Source: Biomed Res Int. 2018 May 17;2018:3870508. doi: 10.1155/2018/3870508 (PMC5985083; doi:10.1155/2018/3870508)
Supplement: Supplementary Materials — Figure S1: electrostatic isocontours and fingerprints for haemagglutinin HA1 chains from the complete dataset of sixty-four H5 viruses (see ED analysis presented in Figure 1). Four, 90° stepwise rotation views are provided for each isocontour. Viruses were isolated from (a) avian; (h) human; (m) other mammalian hosts. Virus numbering is based on the group (G1 to G7) and on its position in the heatmap. Fingerprints are highlighted by green and yellow boxes. Figure S2: ED analysis (heatmap) of a sixty-four haemagglutinin HA1 chains dataset from H7, H4, and H6 viruses. Group numbering and colour coding as in Figure 1. Figure S3: ED analysis (heatmap) of a sixty-four haemagglutinin RBD + VED subregions from H7, H4, and H6 viruses. Group numbering and colour coding as in Figure 3. [file 3870508.f1.zip]

Archive with 4 entries (3 files):
- 3870508.f1/
- 3870508.f1/righetto-filippini_fig_S1.ppt
- 3870508.f1/righetto-filippini_fig_S2.ppt
- 3870508.f1/righetto-filippini_fig_S3.ppt
